# Supplementary material for: Highly transparent silver nanowire–polyimide electrode as a snow-cleaning device
Source: Royal Society of Chemistry journal article supplement (doi:10.1039/c6ra12828a), 2016-01-01
Supplement: c6ra12828a1.pdf [file c6ra12828a1.pdf]

## Supplementary Information

### Highly Transparent Silver Nanowires-Polyimide Electrode for Snow-Cleaning Device

By *Chin-Yen Chou*,<sup>‡</sup> *Huan-Shen Liu*,<sup>‡</sup> and *Guey-Sheng Liou*<sup>\*</sup>

Functional Polymeric Materials Laboratory, Institute of Polymer Science and Engineering,  
National Taiwan University, 1 Roosevelt Road, 4th Sec., Taipei 10617, Taiwan.

Tel: 886-2-33665315; Fax: 886-2-33665237; E-mail: [gsliou@ntu.edu.tw](mailto:gsliou@ntu.edu.tw)

#### List of Contents for Supplementary Material:

---

|                                                                                                                                                      |             |
|------------------------------------------------------------------------------------------------------------------------------------------------------|-------------|
| <b>Figure S1</b> SEM photos of synthesized high aspect ratio AgNWs.....                                                                              | <u>SI-2</u> |
| <b>Figure S2</b> TGA curves of TFMBCH and CHDABP PI.....                                                                                             | <u>SI-2</u> |
| <b>Figure S3</b> AFM topographic images of AgNW films.....                                                                                           | <u>SI-3</u> |
| <b>Figure S4</b> The sheet resistance dynamic change of AgNWs-PI hybrid film and ITO-PEN film at the bending experiment in different band angle..... | <u>SI-4</u> |
| <b>Figure S5</b> SEM morphologies of AgNWs-PI hybrid film after dipping in organic solvent for 20 hours.....                                         | <u>SI-5</u> |
| <b>Table S1</b> Solubility of TFMBCH PI, CHDABP PAA, and CHDABP PI.....                                                                              | <u>SI-6</u> |
| <b>Table S2</b> Thermal properties of TFMBCH PI and CHDABP PI.....                                                                                   | <u>SI-6</u> |
| <b>Table S3</b> Optical properties (color space) and cutoff wavelength of transparent polyimides.....                                                | <u>SI-7</u> |
| <b>Table S4</b> Examples and comparisons for AgNWs-polymer hybrid systems.....                                                                       | <u>SI-8</u> |
| <b>Table S5</b> A partial list of performance of AgNWs-PI film reported in literatures.....                                                          | <u>SI-9</u> |

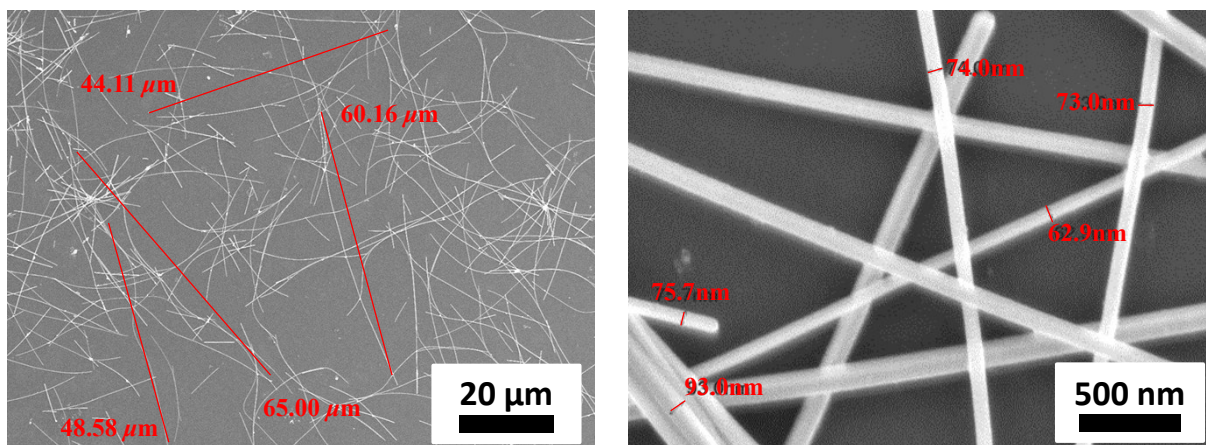

Figure S1 SEM photos of synthesized high aspect ratio AgNWs.

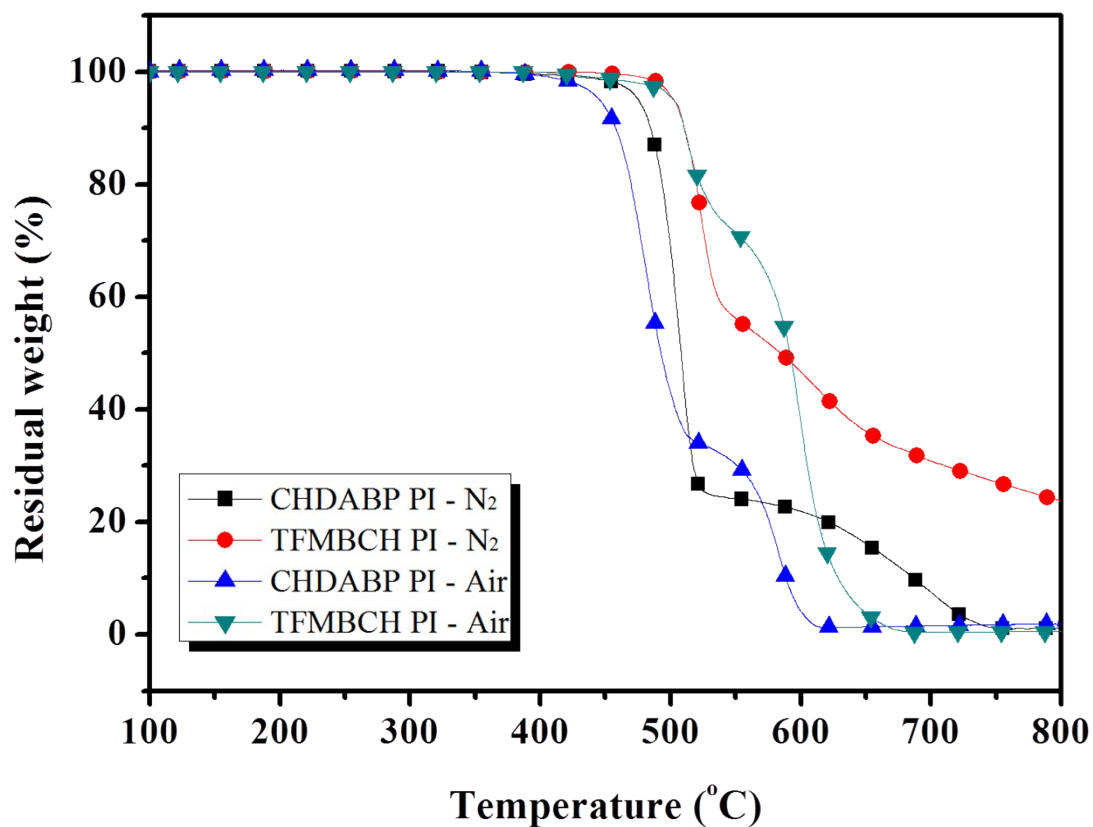

Figure S2 TGA curves of TFMBCH PI and CHDABP PI.

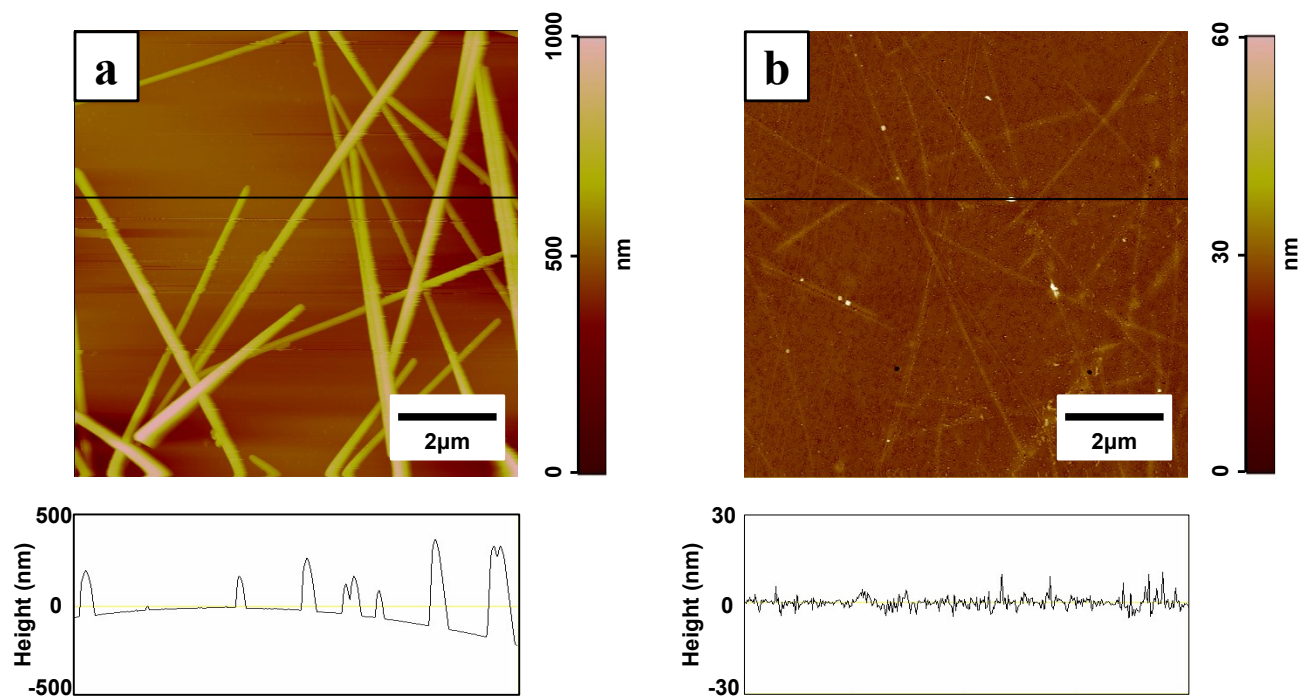

**Figure S3** AFM topographic images of AgNW films (a) with and (b) without PI binder. Line profiles along the black lines are shown below the respective AFM images.

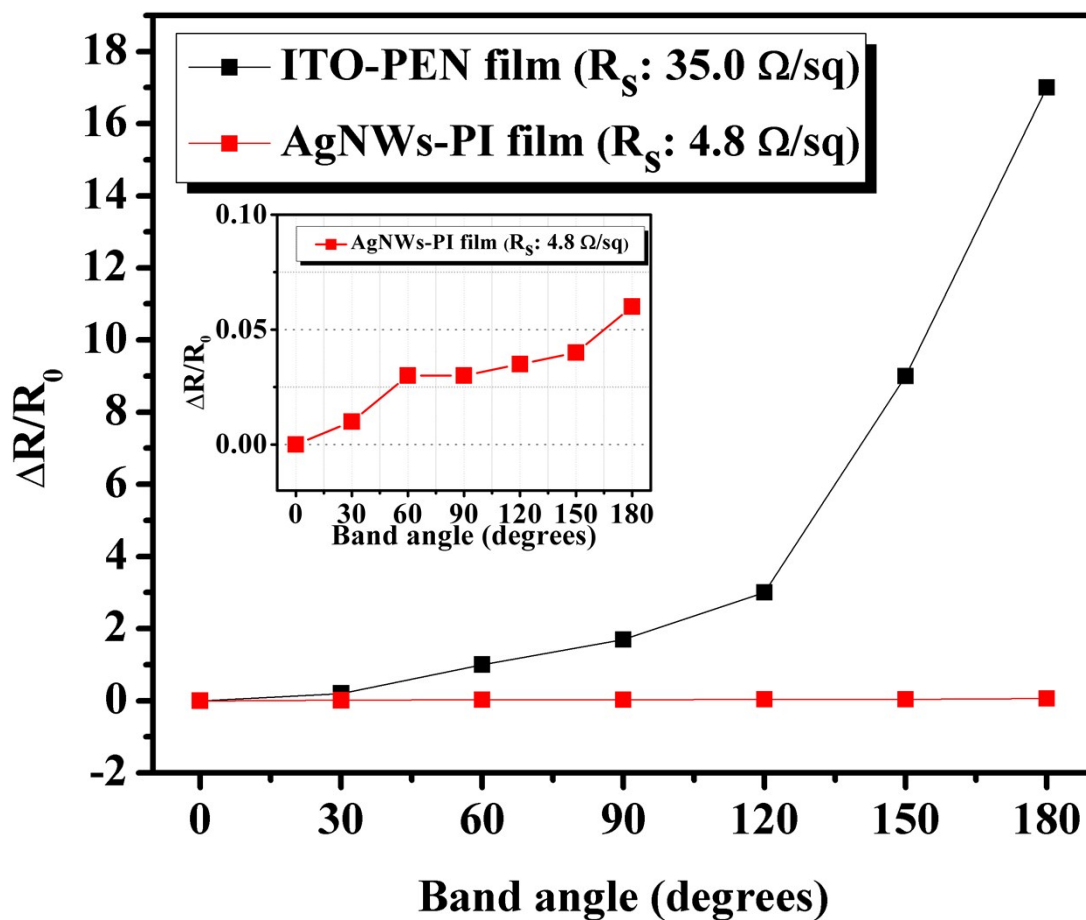

**Figure S4** The sheet resistance dynamic change of AgNWs-PI hybrid film and ITO-PEN film at the bending experiment in different band angle.

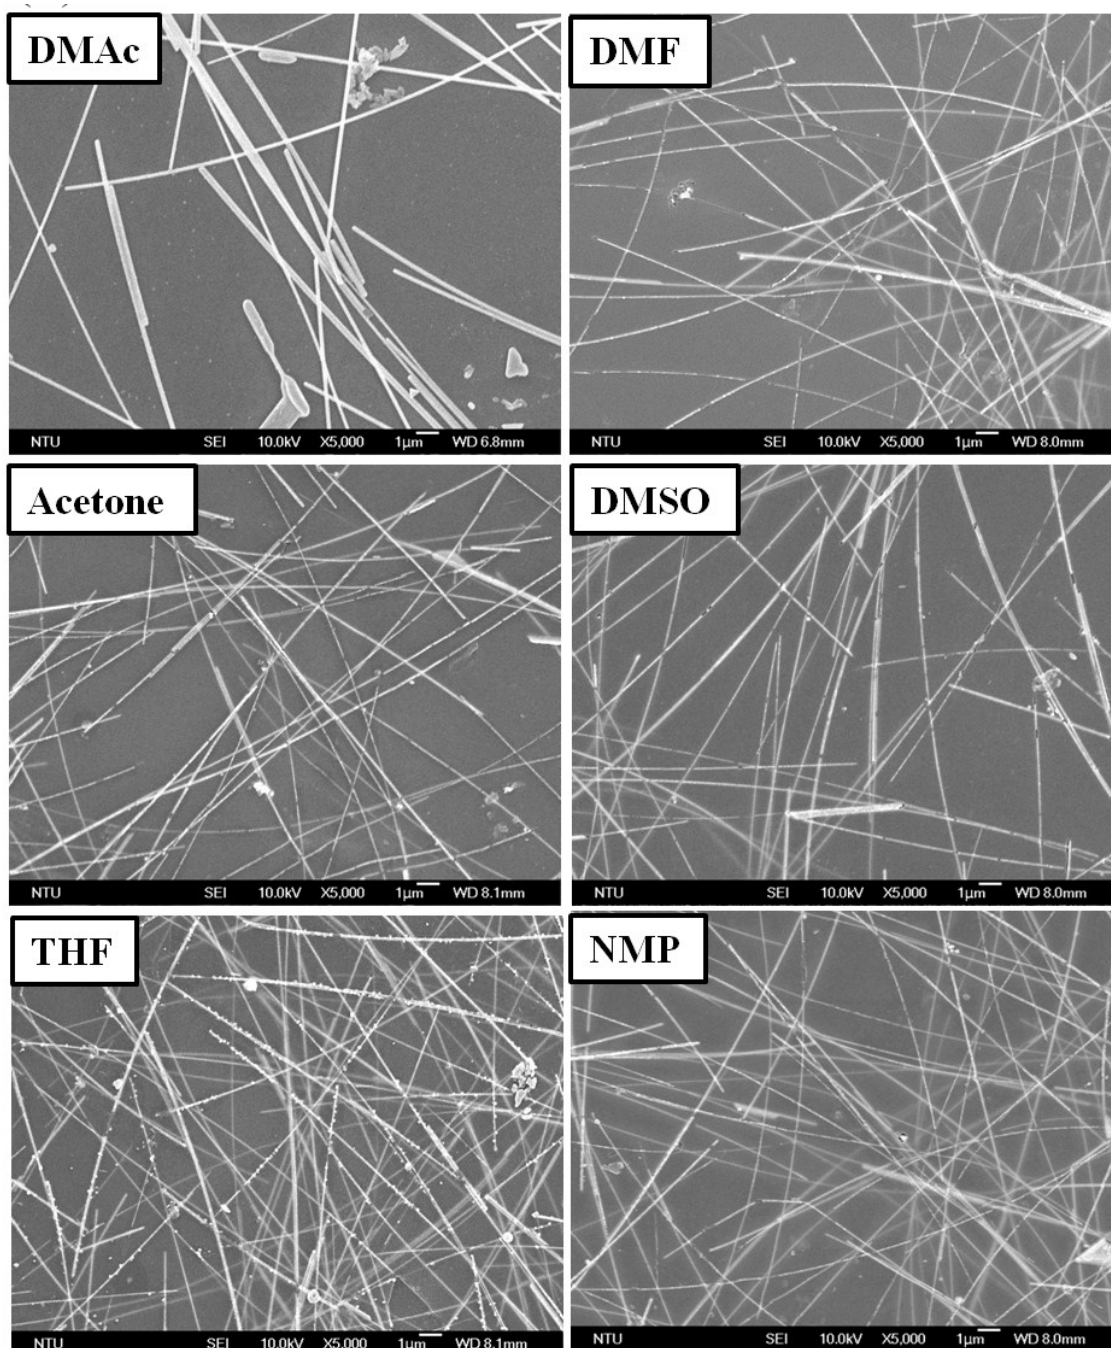

**Figure S5** SEM morphology of AgNWs-PI hybrid films after dipping in various organic solvents for 20 hours, respectively.

**Table S1** Solubility of TFMBCH PI, CHDABP PAA, and CHDABP PI

| Polymer <sup>a</sup> | Solubility behavior in common organic solvent <sup>b</sup> |     |      |          |     |     |     |         |
|----------------------|------------------------------------------------------------|-----|------|----------|-----|-----|-----|---------|
|                      | DMAc                                                       | NMP | DMSO | m-cresol | DCM | THF | DMF | acetone |
| <b>TFMBCH PI</b>     | ++                                                         | ++  | ++   | + -      | + - | ++  | ++  | ++      |
| <b>CHDABP PAA</b>    | ++                                                         | ++  | ++   | ++       | -   | ++  | + - | + -     |
| <b>CHDABP PI</b>     | -                                                          | -   | -    | -        | -   | -   | -   | -       |

<sup>a</sup> Qualitative solubility was tested with more harsh condition: 10 mg of a sample in 1 mL of solvent.

<sup>b</sup> ++, soluble at room temperature; +, soluble on heating; + -, partially soluble or swelling; -, insoluble even on heating.

**Table S2** Thermal properties of the polyimides

| Polymer <sup>a</sup> | T <sub>g</sub> <sup>b</sup> | CTE <sup>c</sup> | T <sub>d</sub> <sup>5</sup> (°C) <sup>d</sup> |                | T <sub>d</sub> <sup>10</sup> (°C) <sup>d</sup> |                | R <sub>w800</sub> <sup>e</sup> | LOI <sup>f</sup> |
|----------------------|-----------------------------|------------------|-----------------------------------------------|----------------|------------------------------------------------|----------------|--------------------------------|------------------|
|                      | (°C)                        |                  | (ppm/°C)                                      | N <sub>2</sub> | Air                                            | N <sub>2</sub> |                                |                  |
| <b>TFMBCH PI</b>     | 405                         | 78               | 480                                           | 470            | 505                                            | 510            | 28.5                           | 28.9             |
| <b>CHDABP PI</b>     | 390                         | 8                | 480                                           | 440            | 490                                            | 450            | 5.5                            | 19.7             |

<sup>a</sup> All polyimide films were heated at 300 °C for 1 h prior to all the thermal analyses.

<sup>b</sup> Glass transition temperature measured by TMA with a constant applied load of 10 mN at a heating rate of 10 °C/min by film/fiber mode.

<sup>c</sup> The coefficient of linear thermal expansion data were determined over a 50~200 °C range by TMA.

<sup>d</sup> Temperature at which 5 % and 10 % weight loss occurred, respectively, recorded by TGA at a heating rate of 20 °C/min and a gas flow rate of 20 cm<sup>3</sup>/min.

<sup>e</sup> Residual weight percentages at 800 °C under nitrogen, also called as char yield.

<sup>f</sup> LOI = Limiting Oxygen Index = ( 17.5+0.4×char yield ).

**Table S3** Optical properties and color coordinate of the transparent polyimides

| Polymer <sup>a</sup> | Color coordinate <sup>b</sup> |       |      | T (%) <sup>c</sup> |       | $\lambda_o$ <sup>d</sup><br>(nm) |
|----------------------|-------------------------------|-------|------|--------------------|-------|----------------------------------|
|                      | L*                            | a*    | b*   | 400nm              | 550nm |                                  |
| <b>TFMBCH PI</b>     | 96.20                         | -0.11 | 0.69 | 90                 | 91    | 284                              |
| <b>CHDABP PI</b>     | 94.35                         | -0.24 | 1.56 | 85                 | 87    | 350                              |

<sup>a</sup> The thickness of all the colorless polyimide films are about 30  $\mu\text{m}$ .

<sup>b</sup> The CIE 1976 (L\*, a\*, b\*) color space.

<sup>c</sup> Transmittance at 400 nm and 550 nm of wavelength measured by UV-vis.

<sup>d</sup> Cutoff wavelength of polyimide.

**Table S4** Examples and comparisons for AgNWs-polymer hybrid systems

| Substrate type | Aspect ratio of AgNWs | R <sub>s</sub> (Ω/sq) | T <sub>550nm</sub> <sup>a</sup> (%) | FoM | Notes                                          | Ref. |
|----------------|-----------------------|-----------------------|-------------------------------------|-----|------------------------------------------------|------|
| PET            | 640                   | 4                     | 63                                  | 180 | Hybrid with CNT                                | S1   |
|                | 250                   | 26                    | 90                                  | 135 | Hybrid with CNT                                | S2   |
|                | 350                   | 13                    | 88                                  | 220 | Hybrid with graphene oxide                     | S3   |
|                | 260                   | 10                    | 84                                  | 200 | Hybrid with PEDOT:PSS                          | S4   |
|                | 330                   | 33                    | 84                                  | 65  | Hybrid with PEDOT:PSS                          | S5   |
|                | 500                   | 20                    | 80                                  | 80  | Solar cell                                     | S6   |
|                | 500                   | 91                    | 97                                  | 195 | Heater                                         | S7   |
| PDMS           | 165                   | 10                    | 85                                  | 220 | Filter vacuum transferring                     | S8   |
|                | 450                   | 15                    | 82                                  | 120 | Stamp transferring                             | S9   |
|                | 500                   | 14                    | 80                                  | 115 | Filter vacuum transferring                     | S10  |
|                | 350                   | 7                     | 63                                  | 100 | Filter vacuum & pressing                       | S11  |
|                | 500                   | 70                    | 90                                  | 50  | Filter vacuum transferring                     | S12  |
| Polyacrylate   | 250                   | 17.5                  | 85.1                                | 130 | Transferring & press                           | S13  |
|                | 100                   | 30                    | 86                                  | 80  | Transferring                                   | S14  |
|                | 100                   | 35                    | 85                                  | 64  | Transferring                                   | S15  |
| PU             | 165                   | 8                     | 75                                  | 155 | Transferring                                   | S16  |
|                | 10                    | 80                    | 86                                  | 20  | Dip coating                                    | S17  |
| PC             | 215                   | 29                    | 92                                  | 150 | Electrostatic Spraying                         | S18  |
|                | 230                   | 88                    | 80                                  | 18  | Drop casting                                   | S19  |
| PVA            | 110                   | 10                    | 80                                  | 160 | Hybrid PEDOT:PSS<br>Filter vacuum transferring | S20  |
|                | 220                   | 50                    | 85                                  | 45  | Hybrid PEDOT:PSS<br>Spin coating               | S21  |

<sup>a</sup> Transmittance at 400 nm and 550 nm of wavelength measured by UV-vis.



**Table S5** A partial list of performance of AgNWs-PI films reported in literatures

| Publish year | Ref. | PI                      | $\lambda_0^a$<br>(nm) | T (%) <sup>b</sup> |           | R <sub>s</sub><br>( $\Omega$ /sq) | FoM       |           | Application          |
|--------------|------|-------------------------|-----------------------|--------------------|-----------|-----------------------------------|-----------|-----------|----------------------|
|              |      |                         |                       | 400<br>nm          | 550<br>nm |                                   | 400<br>nm | 550<br>nm |                      |
| 2012         | S22  | Commercial <sup>c</sup> | 350                   | 30                 | 85        | 21.7                              | 10        | 105       | Solar cell           |
| 2013         | S23  | Commercial <sup>c</sup> | -                     | 80                 | 89        | 33.0                              | 48        | 105       | Wearable electronics |
| 2014         | S24  | Commercial <sup>d</sup> | 360                   | 30                 | 90        | 15                                | 15        | 230       | Heater               |
|              | S25  | - <sup>e</sup>          | 390                   | 20                 | 40        | 4                                 | 40        | 80        | Solar cell           |
| 2015         | S26  | TFMBCH PI               | 300                   | 40                 | 58        | 5.6                               | 58        | 105       | Heater               |
|              | S27  | 6FDACH PI               | 276                   | 68                 | 74        | 7                                 | 125       | 160       | Heater/ECD           |
| This work    |      | TFMBCH/<br>CHDABP PI    | 290                   | 57                 | 70        | 3.5                               | 165       | 260       | Heater               |

<sup>a</sup> Cutoff wavelength of polyimide.

<sup>b</sup> Transmittance at 400 nm and 550 nm of wavelength measured by UV-vis.

<sup>c</sup> Not mentioned.

<sup>d</sup> Product model of commercial PI: VTEC-080051.

<sup>e</sup> Not mentioned.

## References

- [S1] D. Kim, L. Zhu, D.-J. Jeong, K. Chun, Y.-Y. Bang, S.-R. Kim, J.-H. Kim, S.-K. Oh, *Carbon*, 2013, **63**, 530-536.
- [S2] J. Lee, J. Y. Woo, J. T. Kim, B. Y. Lee, C. S. Han, *ACS Appl. Mater. Inter.*, 2014, **6**, 10974-10980.
- [S3] I. K. Moon, J. I. Kim, H. Lee, K. Hur, W. C. Kim, H. Lee, *Sci. Rep.*, 2013, **3**.
- [S4] D. Y. Choi, H. W. Kang, H. J. Sung, S. S. Kim, *Nanoscale*, 2013, **5**, 977-983
- [S5] L. Yang, T. Zhang, H. Zhou, S. C. Price, B. J. Wiley, W. You, *ACS Appl. Mater. Inter.*, 2011, **3**, 4075-4084.
- [S6] S.-E. Park, S. Kim, D.-Y. Lee, E. Kim, J. Hwang, *J. Mater. Chem. A*, 2013, **1**, 14286.
- [S7] T. Kim, Y. W. Kim, H. S. Lee, H. Kim, W. S. Yang, K. S. Suh, *Adv. Funct. Mater.*, 2013, **23**, 1250-1255.
- [S8] A. R. Madaria, A. Kumar, F. N. Ishikawa, C. Zhou, *Nano Res.*, 2010, **3**, 564-573.
- [S9] H. J. Lee, J. H. Hwang, K. B. Choi, S. G. Jung, K. N. Kim, Y. S. Shim, C. H. Park, Y. W. Park, B. K. Ju, *ACS Appl. Mater. Inter.*, 2013, **5**, 10397-10403.
- [S10] X. Ho, J. Nie Tey, W. Liu, C. Kweng Cheng, J. Wei, *J. Appl. Phys.*, 2013, **113**, 044311.
- [S11] C. Preston, Y. Xu, X. Han, J. N. Munday, L. Hu, *Nano Res.*, 2013, **6**, 461-468.
- [S12] P. Lee, J. Lee, H. Lee, J. Yeo, S. Hong, K. H. Nam, D. Lee, S. S. Lee, S. H. Ko, *Adv. Mater.*, 2012, **24**, 3326-3332.
- [S13] W. Hu, X. Niu, L. Li, S. Yun, Z. Yu, Q. Pei, *Nanotechnology*, 2012, **23**, 344002.
- [S14] Z. Yu, Q. Zhang, L. Li, Q. Chen, X. Niu, J. Liu, Q. Pei, *Adv. Mater.*, 2011, **23**, 664-668.
- [S15] L. Li, Z. Yu, W. Hu, C. H. Chang, Q. Chen, Q. Pei, *Adv. Mater.*, 2011, **23**, 5563-5567.
- [S16] S. P. Chen, Y. C. Liao, *Phys. Chem. Chem. Phys.*, 2014, **16**, 19856-19860.
- [S17] H.-W. Tien, S.-T. Hsiao, W.-H. Liao, Y.-H. Yu, F.-C. Lin, Y.-S. Wang, S.-M. Li, C.-C. M. Ma, *Carbon*, 2013, **58**, 198-207.
- [S18] T. Kim, A. Canlier, G. H. Kim, J. Choi, M. Park, S. M. Han, *ACS Appl. Mater. Inter.*, 2013, **5**, 788-794.
- [S19] I. Moreno, N. Navascues, M. Arruebo, S. Irusta, J. Santamaria, *Nanotechnology*, 2013, **24**, 275603.
- [S20] X. Y. Zeng, Q. K. Zhang, R. M. Yu, C. Z. Lu, *Adv. Mater.*, 2010, **22**, 4484-4488.
- [S21] S. Narayanan, J. R. Hajzus, C. E. Treacy, M. R. Bockstaller, L. M. Porter, *ECS J. Solid State Sc.*, 2014, **3**, P363-P369.
- [S22] J.-W. Lim, D.-Y. Cho, K. Eun, S.-H. Choa, S.-I. Na, J. Kim, H.-K. Kim, *Sol. Energy Mater. Sol. Cells*, 2012, **105**, 69-76.
- [S23] J. Jiu, T. Sugahara, M. Nogi, T. Araki, K. Suganuma, H. Uchida, K. Shinozaki,

*Nanoscale*, 2013, **5**, 11820-11828.

[S24] D. S. Ghosh, T. L. Chen, V. Mkhitarian, V. Pruneri, *ACS Appl. Mater. Inter.*, 2014, **6**, 20943-20948.

[S25] X. Guo, X. Liu, J. Luo, Z. Gan, Z. Meng and N. Zhang, *RSC Adv.*, 2015, **5**, 24953-24959.

[S26] Q. Huang, W. Shen, X. Fang, G. Chen, J. Guo, W. Xu, R. Tan, W. Song, *RSC Adv.*, 2015, **5**, 45836-45842.

[S27] H.-Y. Lu, C.-Y. Chou, J.-H. Wu, J.-J. Lin and G.-S. Liou, *J. Mater. Chem. C*, 2015, **3**, 3629-3635.
